# Supplementary material
Source: Springer Nature journal article supplement (https://www.springermedizin.de/resource/supplementary/12883_2008_239_MOESM3_ESM.pdf/9457140)

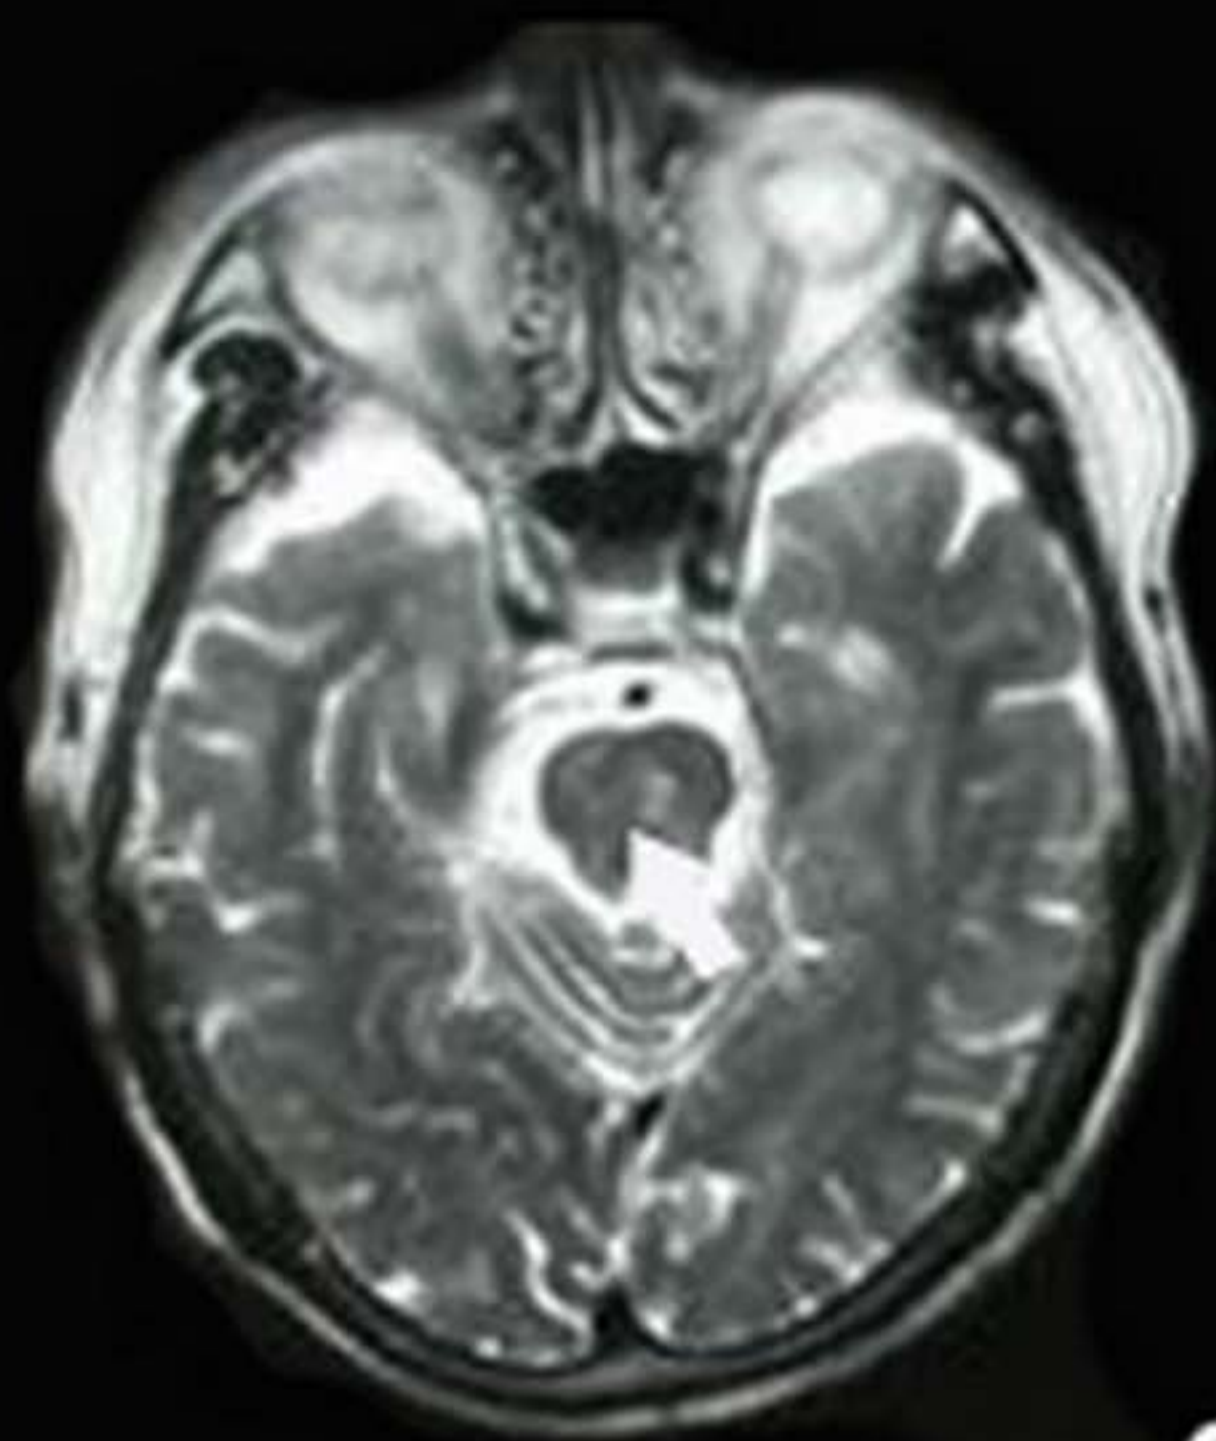

**a**

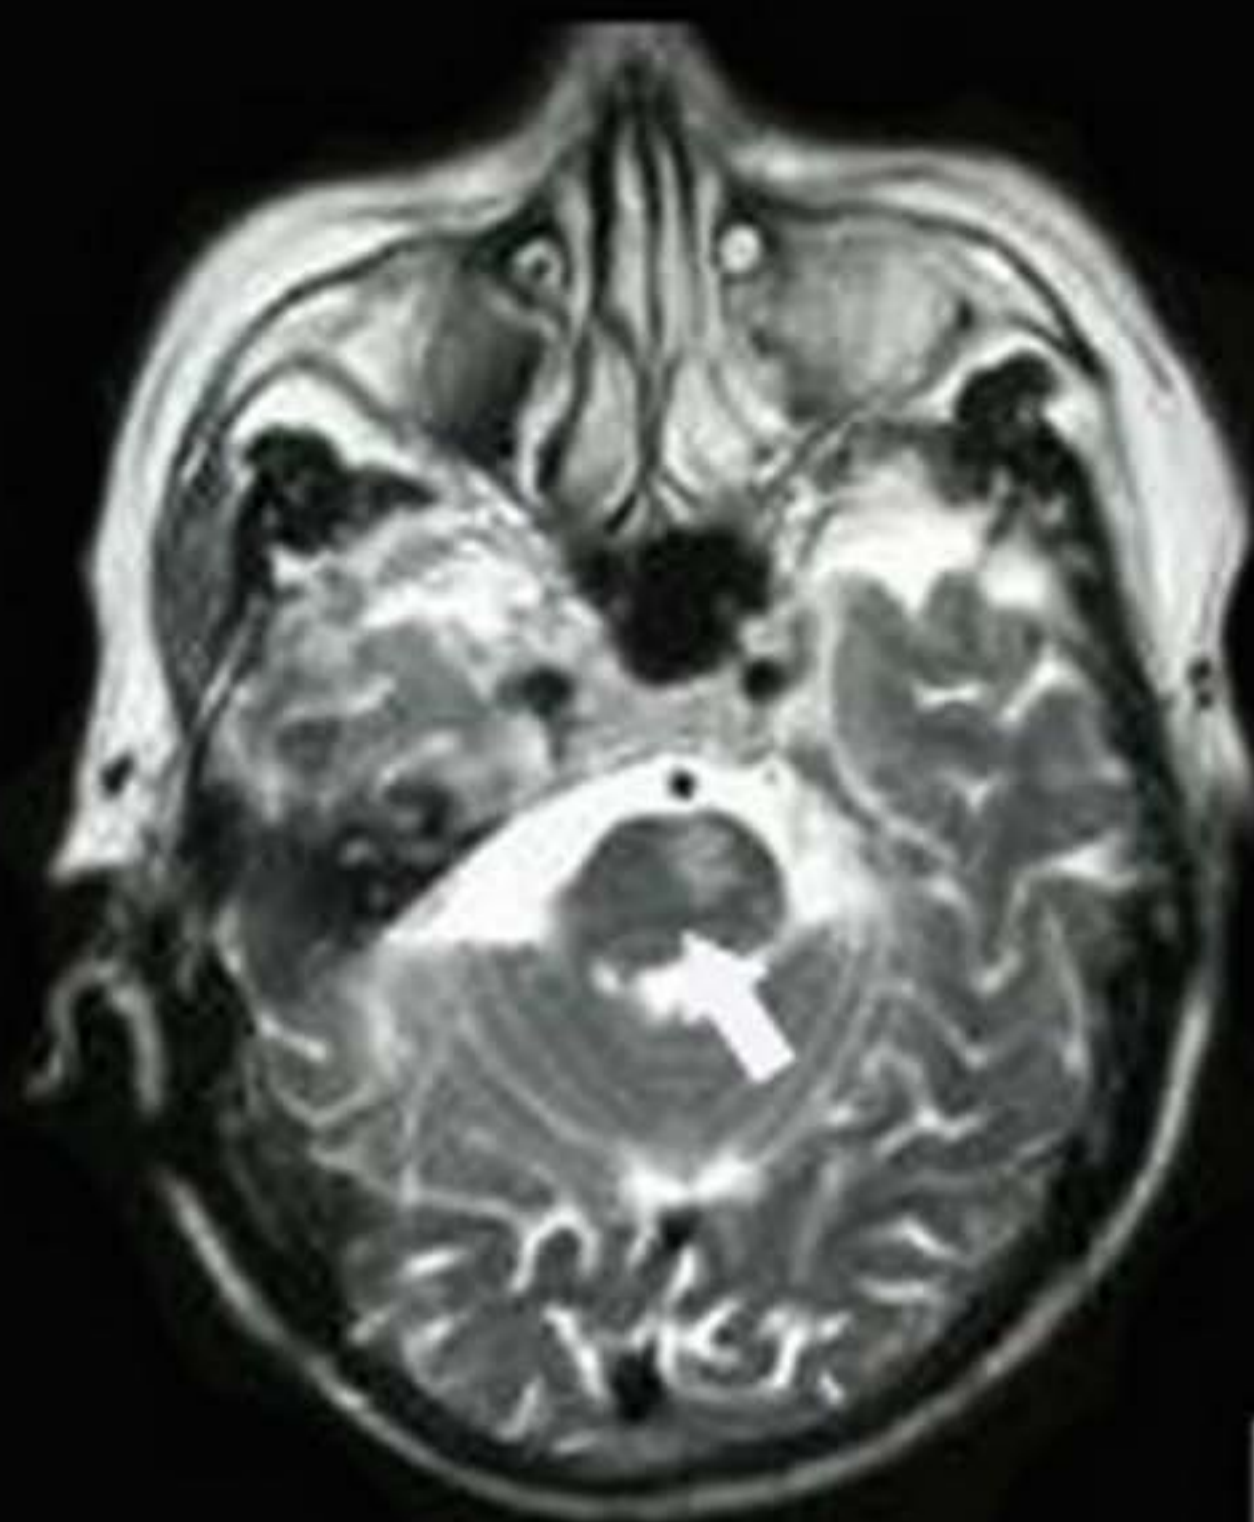

**b**

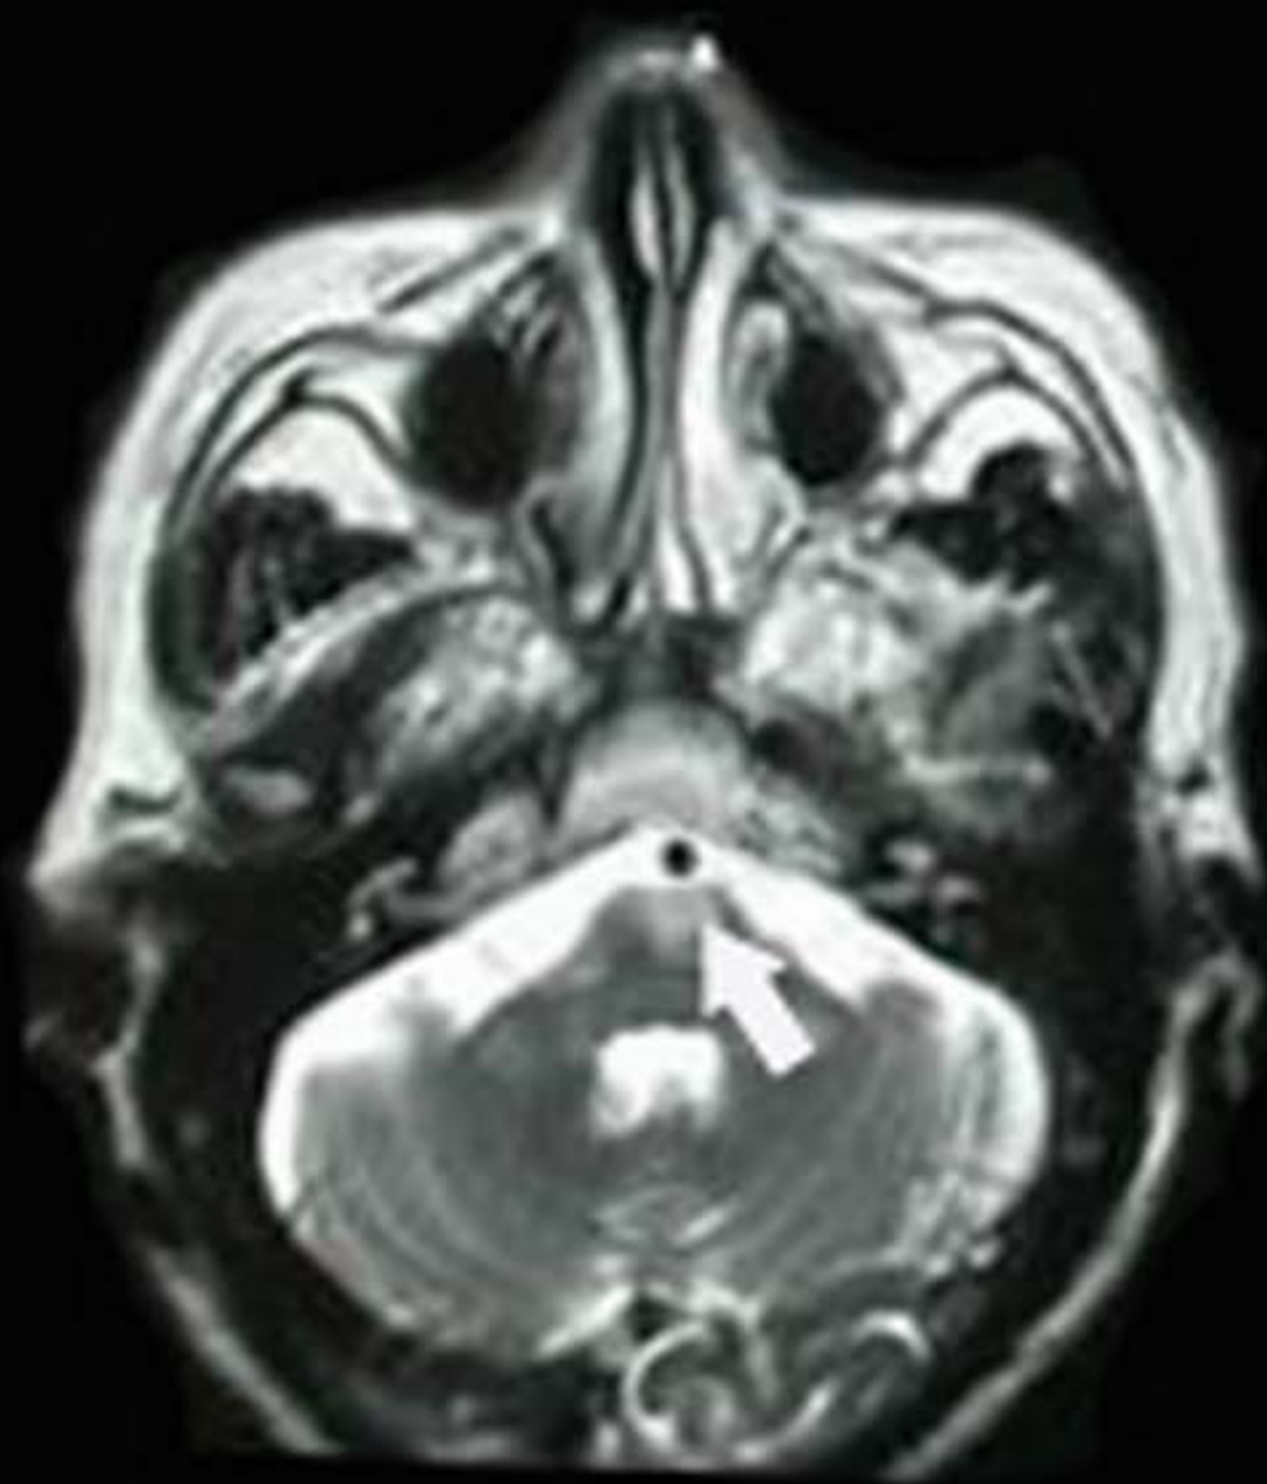

**c**

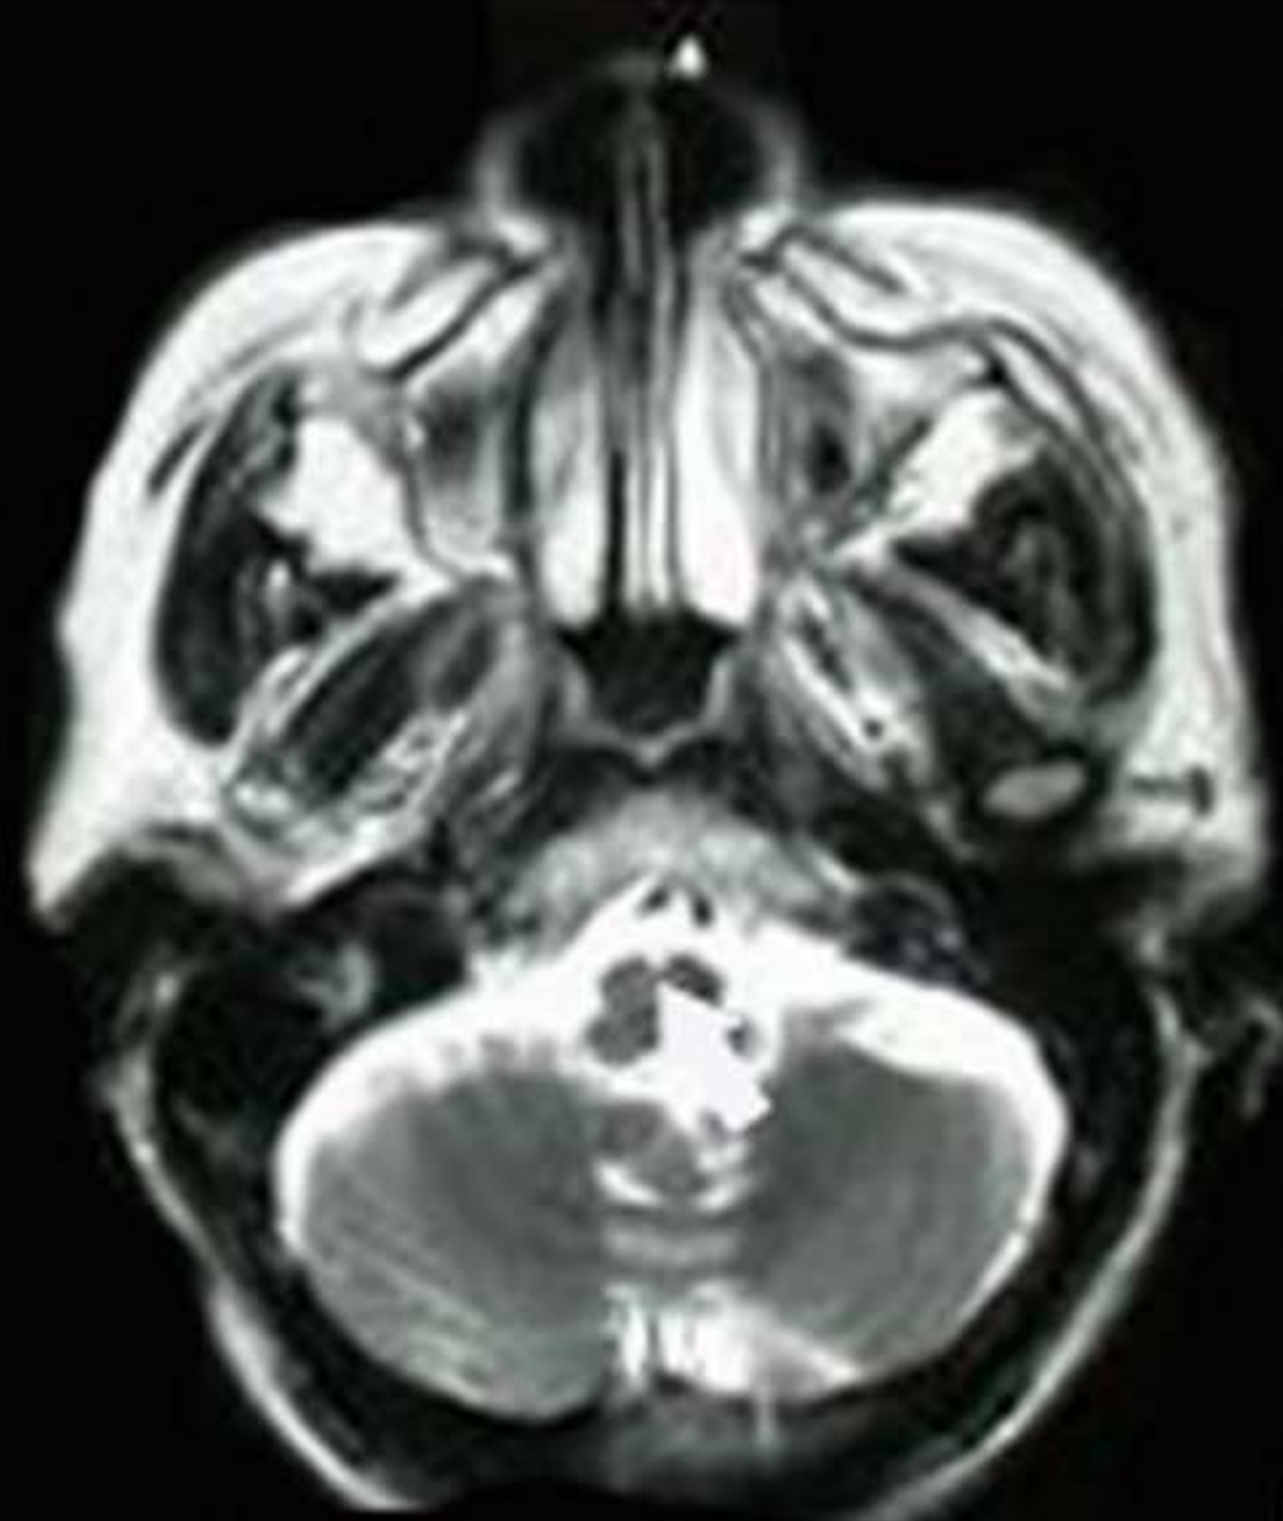

**d**

Supplement: MOESM3 [file 9457140]
